# Supplementary material for: Tumor-infiltrating lymphocytes predict prognosis of breast cancer patients treated with anti-Her-2 therapy
Source: PubMed Central journal article supplement (PMC5354903; doi:10.18632/oncotarget.14124), 2016-12-23
Supplement: oncotarget-08-5219-s001.pdf [file oncotarget-08-5219-s001.pdf]

## **Tumor-infiltrating lymphocytes predict prognosis of breast cancer patients treated with anti-Her-2 therapy**

### **SUPPLEMENTARY TABLE**

**Supplementary Table S1: Quantification of FOXP3+ Tregs, CD68+ M $\phi$  and IL-17+ Th17.**

**See Supplementary File 1**
